# Supplementary material for: Unraveling Scale-Dependent Relationships Among Ecological Services Using a Machine Learning and PLS-SEM Approach in Northeast China
Source: Research Square preprint supplement (doi:10.21203/rs.3.rs-8164308/v1), 2025-12-08
Supplement: Supplementary file 1 [file 1d9065a29cb18b2b0a6dd7f9.docx]

1. **Water yield (WY)**

Annual water yield is estimated based on the water balance principle. The main algorithm is as follows:

where represents the annual water yield, AET(x) denotes the actual annual evapotranspiration of grid x, represents the annual precipitation of grid unit x.

1. **Soil conservation (SC)**

Soil conservation is used to evaluate the amount of soil erosion and soil retention in the study area (Wen and Liu, 2025); and its calculation formula is:

where Δ*A* is the soil conservation (t ha-1 y-1), *A*0 is the potential soil loss, *Av* is the soil loss in the actual land cover and soil erosion control practice situation, R is the rainfall erosivity factor (MJ mm ha—1 h-1 yr-1), K is the soil erodibility factor (t ha h ha-1 MJ-1 mm-1), L is the slope length factor (dimensionless), and S is the slope factor (dimensionless), and (dimensionless) denote the vegetation cover factor and the soil erosion control factor under the actual land cover and erosion control practice conditions.

1. **Habitat quality assessment equation (HQ)**

This study designed croplands, built-up land, and unused land as stressors, while forests, grasslands, and water body as habitats. The formula is as follows:

where represents the habitat quality of raster x in LULC j. is the habitat suitability of LULC j. z is the default parameter. K is the half- saturation constant, which is 0.2 in this paper. describes the habitat degradation index of raster x in land use type j, which indicates the degree of habitat degradation under stress.

1. **Grain production (GP):**

GP data were obtained directly from district level Statistical Year books and spatially allocated based on the vegetation condition index. The calculation formula is as follows:

where represents the grain production of the ith cultivated land grid in the jth province; Meteorological data Monthly precipitation, monthly temperature, monthly evapotranspiration National Meteorological Science Data Center (https://data.cma.cn/) represents the total grain production; represents the normalized difference vegetation index of ith land grid in the jth province.

**Carbon Storage (CS)**

The total organic carbon above ground, underground, in soil and dead in the ecosystem is calculated using the following formula:

where C total represents the total carbon storage; C above denotes the above-ground biomass carbon; C below refers to the root biomass carbon; C dead signifies the carbon in dead organic matter; C soil indicates the carbon stored in the soil carbon pool.

**Geo-Detector model**

The GDM is a series of statistical methods developed by Wang and Xu (2017), to detect the spatial variability and further quantify the driving forces. The basic concept assumes that if independent variables of a certain element in the study area affect dependent variables, then their spatial distributions are also similar.

Factor detection. To explore the spatial differentiation of the ESs. The explanatory power of 9 influencing factors on the spatial differentiation of eco-environmental quality in the Yellow River Delta was also explored. The q value is used to perform the measurement. A larger q value leads to more obvious spatial differentiation of the ESs. If spatial differentiation is caused by the X influence factor, a greater q value indicates a stronger explanatory power of X to the ESs, and vice versa. The formula for calculating the q is as follows:

where SSW and SST refer to the within sum of squares in the sub region and total sum of squares in the whole area, respectively; t =1, …,m denotes the sub regions of the RSEI value or each influence factor; and N stand for the total number of units in subrange t and the entire region, respectively; and and indicate the variance of ESs value in region t and the entire study area.

**Reference**

Wang, J., & Xu, C. (2017). Geographical detector: Principle and prospective. Acta Geographica
Sinica, 72(1), 116-134

Wen, R., Liu, Z., 2025. Exploring trade-offs and synergies between economy development and ecosystem sustainability of the eco-fragile regions in the context of food security. J. Clean. Prod. 510, 145604. https://doi.org/https://doi.org/10.1016/j.jclepro.2025.145604

**List of tables**

**Table S1** Descriptions of the data used in this study.

| **Type** | **Data** | **Source** |
| --- | --- | --- |
| Land data | LULC | Resource and Environmental Data Center  (<https://www.resdc.cn/>) |
| Natural data | Elevation | National Aeronautics and Space Administration (https://search.earthda ta.nasa.gov/search) |
| NDVI | [National ecological data center resource sharing service platform](https://www.nesdc.org.cn/)  <https://www.nesdc.org.cn/> |
| Soil property | Harmonized World Soil Database  (https ://www.fao.org/soils-portal/data -hub/soil-maps-and-databases/harmonized-world-soil-database-v12/en/) |
| Temperature | Resource and Environmental Data Center (<https://www.resdc.cn/>) |
| Precipitation | Resource and Environmental Data Center (<https://www.resdc.cn/>) |
| Evapotranspiration | Resource and Environmental Data Center (<https://www.resdc.cn/>) |
| Depth to bedrock | Depth to Bedrock Map of China  <http://globalchange.bnu.edu.cn/research/cdtb.jsp#cite> |
| Socio- economic data | Nighttime Lights | [https://doi.org/10.6084/m9.figshare.9 828827.v2](https://doi.org/10.6084/m9.figshare.9%20828827.v2) |
| River map | <https://www.openstreetmap.org/> |
| Road map | <https://www.openstreetmap.org/> |
| GDP | Resource and Environmental Data Center (<https://www.resdc.cn/>) |

**Table S2.** PLS-SEM Path Coefficients and Statistical Summary for pixel scale from 2000 to 2020.

| **Path** | **Original sample (O)** | **Sample mean (M)** | **Bias** | **Standard Deviation** | **T-statistics** | **2.5%** | **97.5%** |
| --- | --- | --- | --- | --- | --- | --- | --- |
| **2000** | | | | | | | |
| GP → CS | 0.547 | 0.547 | 0.000 | 0.014 | 38.655 | 0.518 | 0.573 |
| GP → HQ | 0.648 | 0.648 | 0.000 | 0.013 | 50.027 | 0.621 | 0.672 |
| HQ → CS | 0.844 | 0.844 | 0.000 | 0.006 | 130.879 | 0.831 | 0.856 |
| SC → CS | 0.213 | 0.213 | 0.000 | 0.012 | 17.877 | 0.189 | 0.236 |
| SC → GP | 0.749 | 0.749 | 0.000 | 0.005 | 148.269 | 0.739 | 0.759 |
| SC → HQ | 0.252 | 0.252 | 0.000 | 0.012 | 20.290 | 0.227 | 0.276 |
| SC → WY | 0.423 | 0.423 | 0.000 | 0.015 | 28.267 | 0.393 | 0.452 |
| WY → CS | -0.421 | -0.421 | 0.000 | 0.007 | 57.960 | -0.435 | -0.406 |
| WY → GP | 0.080 | 0.080 | 0.000 | 0.010 | 8.000 | 0.062 | 0.100 |
| WY → HQ | -0.499 | -0.499 | 0.000 | 0.012 | 41.583 | -0.515 | -0.482 |
| **2010** | | | | | | | |
| GP → CS | 0.466 | 0.466 | 0.000 | 0.015 | 32.021 | 0.437 | 0.494 |
| GP → HQ | 0.554 | 0.554 | 0.000 | 0.013 | 41.512 | 0.528 | 0.580 |
| HQ → CS | 0.840 | 0.840 | 0.000 | 0.006 | 130.201 | 0.827 | 0.853 |
| SC → CS | 0.133 | 0.133 | 0.000 | 0.011 | 11.956 | 0.111 | 0.154 |
| SC → GP | 0.648 | 0.648 | 0.000 | 0.007 | 89.023 | 0.633 | 0.662 |
| SC → HQ | 0.158 | 0.158 | 0.000 | 0.012 | 12.914 | 0.134 | 0.181 |
| SC → WY | 0.611 | 0.610 | 0.000 | 0.018 | 33.333 | 0.572 | 0.644 |
| WY → CS | -0.361 | -0.361 | -0.001 | 0.009 | 38.705 | -0.378 | -0.342 |
| WY → GP | -0.180 | -0.180 | 0.000 | 0.013 | 13.569 | -0.206 | -0.154 |
| WY → HQ | -0.429 | -0.430 | -0.001 | 0.009 | 45.709 | -0.447 | -0.410 |
| **2020** | | | | | | | |
| GP → CS | 0.493 | 0.493 | 0.000 | 0.013 | 37.090 | -0.200 | -0.162 |
| GP → HQ | 0.584 | 0.584 | 0.000 | 0.012 | 48.679 | -0.471 | -0.441 |
| HQ → CS | 0.845 | 0.845 | 0.000 | 0.007 | 129.825 | 0.337 | 0.383 |
| SC → CS | 0.208 | 0.209 | 0.000 | 0.013 | 15.914 | 0.403 | 0.447 |
| SC → GP | 0.733 | 0.733 | 0.000 | 0.006 | 117.452 | -0.005 | 0.016 |
| SC → HQ | 0.246 | 0.247 | 0.000 | 0.014 | 17.669 | -0.006 | 0.019 |
| SC → WY | 0.336 | 0.335 | 0.000 | 0.020 | 16.621 | -0.002 | 0.006 |
| WY → CS | -0.450 | -0.451 | 0.000 | 0.007 | 60.314 | -0.002 | 0.005 |
| WY → GP | 0.012 | 0.012 | 0.000 | 0.011 | 1.113 | 0.467 | 0.519 |
| WY → HQ | -0.533 | -0.533 | 0.000 | 0.009 | 62.392 | -0.003 | 0.011 |

**Table S3.** PLS-SEM Path Coefficients and Statistical Summary for county scale from 2000 to 2020.

| **Path** | **Original sample (O)** | **Sample mean (M)** | **Bias** | **Standard Deviation** | **T-statistics** | **2.5%** | **97.5%** |
| --- | --- | --- | --- | --- | --- | --- | --- |
| **2000** | | | | | | | |
| GP → CS | 0.423 | 0.422 | 0.000 | 0.013 | 31.902 | 0.397 | 0.450 |
| GP → HQ | 0.497 | 0.497 | 0.000 | 0.013 | 36.883 | 0.471 | 0.524 |
| HQ → CS | 0.850 | 0.849 | 0.000 | 0.006 | 142.122 | 0.838 | 0.861 |
| SC → CS | 0.141 | 0.141 | 0.000 | 0.010 | 13.577 | 0.121 | 0.162 |
| SC → GP | 0.443 | 0.444 | 0.001 | 0.017 | 26.251 | 0.409 | 0.476 |
| SC → HQ | 0.165 | 0.166 | 0.000 | 0.012 | 14.109 | 0.143 | 0.189 |
| SC → WY | 0.116 | 0.116 | 0.000 | 0.015 | 7.582 | 0.086 | 0.146 |
| WY → CS | -0.352 | -0.352 | 0.000 | 0.012 | 29.740 | -0.374 | -0.328 |
| WY → GP | 0.120 | 0.120 | 0.000 | 0.013 | 9.406 | 0.095 | 0.145 |
| WY → HQ | -0.414 | -0.414 | 0.000 | 0.014 | 29.122 | -0.441 | -0.385 |
| **2010** | | | | | | | |
| GP → CS | 0.388 | 0.388 | 0.001 | 0.007 | 7.729 | 0.360 | 0.415 |
| GP → HQ | 0.458 | 0.458 | 0.001 | 0.010 | 38.598 | 0.429 | 0.485 |
| HQ → CS | 0.847 | 0.847 | 0.000 | 0.009 | 19.251 | 0.835 | 0.859 |
| SC → CS | 0.092 | 0.093 | 0.000 | 0.011 | 20.245 | 0.071 | 0.116 |
| SC → GP | 0.394 | 0.397 | 0.002 | 0.006 | 8.900 | 0.355 | 0.431 |
| SC → HQ | 0.109 | 0.109 | 0.000 | 0.007 | 8.856 | 0.084 | 0.136 |
| SC → WY | 0.223 | 0.225 | 0.002 | 0.001 | 5.512 | 0.175 | 0.273 |
| WY → CS | -0.257 | -0.259 | -0.002 | 0.001 | 5.542 | -0.281 | -0.230 |
| WY → GP | 0.037 | 0.036 | 0.000 | 0.013 | 31.902 | 0.008 | 0.069 |
| WY → HQ | -0.303 | -0.305 | -0.002 | 0.002 | 5.784 | -0.332 | -0.272 |
| **2020** | | | | | | | |
| GP → CS | 0.378 | 0.378 | 0.000 | 0.012 | 30.655 | 0.354 | 0.403 |
| GP → HQ | 0.441 | 0.442 | 0.000 | 0.013 | 35.250 | 0.417 | 0.466 |
| HQ → CS | 0.857 | 0.857 | 0.000 | 0.006 | 146.666 | 0.845 | 0.868 |
| SC → CS | 0.138 | 0.138 | 0.000 | 0.011 | 12.406 | 0.116 | 0.160 |
| SC → GP | 0.425 | 0.426 | 0.001 | 0.017 | 25.175 | 0.390 | 0.456 |
| SC → HQ | 0.161 | 0.162 | 0.000 | 0.013 | 12.777 | 0.136 | 0.186 |
| SC → WY | 0.056 | 0.057 | 0.000 | 0.019 | 2.987 | 0.021 | 0.094 |
| WY → CS | -0.391 | -0.391 | 0.000 | 0.013 | 30.598 | -0.415 | -0.365 |
| WY → GP | 0.034 | 0.034 | 0.000 | 0.015 | 2.325 | 0.006 | 0.063 |
| WY → HQ | -0.456 | -0.457 | -0.001 | 0.015 | 30.347 | -0.485 | -0.426 |

**Table S4.** PLS-SEM Path Coefficients and Statistical Summary for Sub basin scale from 2000 to 2020.

| **Path** | **Original sample (O)** | **Sample mean (M)** | **Bias** | **Standard Deviation** | **T-statistics** | **2.5%** | **97.5%** |
| --- | --- | --- | --- | --- | --- | --- | --- |
| **2000** | | | | | | | |
| GP → CS | 0.540 | 0.541 | 0.001 | 0.019 | 27.770 | 0.501 | 0.577 |
| GP → HQ | 0.641 | 0.642 | 0.001 | 0.017 | 36.946 | 0.607 | 0.674 |
| HQ → CS | 0.842 | 0.842 | 0.000 | 0.009 | 98.265 | 0.825 | 0.859 |
| SC → CS | 0.181 | 0.182 | 0.001 | 0.017 | 10.894 | 0.149 | 0.214 |
| SC → GP | 0.792 | 0.792 | 0.000 | 0.005 | 158.941 | 0.782 | 0.802 |
| SC → HQ | 0.215 | 0.216 | 0.001 | 0.018 | 12.113 | 0.180 | 0.249 |
| SC → WY | 0.536 | 0.536 | 0.000 | 0.012 | 45.873 | 0.512 | 0.558 |
| WY → CS | -0.481 | -0.481 | 0.000 | 0.010 | 46.633 | -0.500 | -0.460 |
| WY → GP | -0.040 | -0.040 | 0.000 | 0.011 | 3.610 | -0.062 | -0.018 |
| WY → HQ | -0.571 | -0.571 | 0.000 | 0.010 | 57.571 | -0.590 | -0.551 |
| **2010** | | | | | | | |
| GP → CS | 0.442 | 0.443 | 0.001 | 0.020 | 22.640 | 0.402 | 0.480 |
| GP → HQ | 0.527 | 0.527 | 0.000 | 0.018 | 28.662 | 0.490 | 0.562 |
| HQ → CS | 0.839 | 0.839 | 0.000 | 0.008 | 102.848 | 0.823 | 0.855 |
| SC → CS | 0.145 | 0.146 | 0.001 | 0.016 | 9.248 | 0.114 | 0.177 |
| SC → GP | 0.669 | 0.669 | 0.001 | 0.009 | 75.070 | 0.652 | 0.687 |
| SC → HQ | 0.173 | 0.174 | 0.001 | 0.017 | 10.052 | 0.139 | 0.207 |
| SC → WY | 0.628 | 0.626 | -0.001 | 0.024 | 26.238 | 0.577 | 0.671 |
| WY → CS | -0.406 | -0.407 | -0.001 | 0.012 | 33.572 | -0.429 | -0.381 |
| WY → GP | -0.375 | -0.375 | 0.000 | 0.022 | 17.333 | -0.417 | -0.332 |
| WY → HQ | -0.484 | -0.484 | -0.001 | 0.011 | 44.192 | -0.504 | -0.462 |
| **2020** | | | | | | | |
| GP → CS | 0.378 | 0.378 | 0.000 | 0.012 | 30.655 | 0.354 | 0.403 |
| GP → HQ | 0.441 | 0.442 | 0.000 | 0.013 | 35.250 | 0.417 | 0.466 |
| HQ → CS | 0.857 | 0.857 | 0.000 | 0.006 | 146.666 | 0.845 | 0.868 |
| SC → CS | 0.138 | 0.138 | 0.000 | 0.011 | 12.406 | 0.116 | 0.160 |
| SC → GP | 0.425 | 0.426 | 0.001 | 0.017 | 25.175 | 0.390 | 0.456 |
| SC → HQ | 0.161 | 0.162 | 0.000 | 0.013 | 12.777 | 0.136 | 0.186 |
| SC → WY | 0.056 | 0.057 | 0.000 | 0.019 | 2.987 | 0.021 | 0.094 |
| WY → CS | -0.391 | -0.391 | 0.000 | 0.013 | 30.598 | -0.415 | -0.365 |
| WY → GP | 0.034 | 0.034 | 0.000 | 0.015 | 2.325 | 0.006 | 0.063 |
| WY → HQ | -0.456 | -0.457 | -0.001 | -0.485 | -0.426 | -0.455 | -0.457 |

**Table S5:** Comparison of model parameters at county scales in 2020

| **ESs** | **model** | **split** | **R2** | **RMSE** | **CR R2** | **CR R2 std** |
| --- | --- | --- | --- | --- | --- | --- |
| CS | Lasso | train | 0.932 | 0.004 | 0.932 | 0.006 |
| test | 0.942 | 0.004 |
| Random Forest | train | 0.999 | 0.000 | 0.998 | 0.000 |
| test | 0.999 | 0.000 |
| XGBoost | train | 0.999 | 0.000 | 0.999 | 0.000 |
| test | 0.997 | 0.000 |
| LightGBM | train | 0.999 | 0.000 | 0.999 | 0.000 |
| test | 0.998 | 0.000 |
| GP | Lasso | train | 0.995 | 0.000 | 0.997 | 0.000 |
| test | 0.995 | 0.000 |
| Random Forest | train | 0.998 | 0.000 | 0.999 | 0.000 |
| test | 0.998 | 0.000 |
| XGBoost | train | 0.999 | 0.000 | 0.999 | 0.000 |
| test | 0.999 | 0.000 |
| LightGBM | train | 0.999 | 0.000 | 0.999 | 0.000 |
| test | 0.998 | 0.000 |
| HQ | Lasso | train | 0.870 | 0.006 | 0.876 | 0.006 |
| test | 0.892 | 0.006 |
| Random Forest | train | 0.994 | 0.000 | 0.997 | 0.001 |
| test | 0.990 | 0.000 |
| XGBoost | train | 0.998 | 0.000 | 0.998 | 0.001 |
| test | 0.990 | 0.000 |
| LightGBM | train | 0.996 | 0.000 | 0.998 | 0.000 |
| test | 0.993 | 0.000 |
| SC | Lasso | train | 0.903 | 0.003 | 0.900 | 0.007 |
| test | 0.905 | 0.002 |
| Random Forest | train | 0.997 | 0.000 | 0.991 | 0.005 |
| test | 0.992 | 0.000 |
| XGBoost | train | 0.990 | 0.000 | 0.993 | 0.006 |
| test | 0.992 | 0.000 |
| LightGBM | train | 0.830 | 0.001 | 0.993 | 0.006 |
| test | 0.822 | 0.001 |
| WY | Lasso | train | 0.989 | 0.000 | 0.831 | 0.018 |
| test | 0.988 | 0.000 |
| Random Forest | train | 0.996 | 0.000 | 0.987 | 0.016 |
| test | 0.997 | 0.000 |
| XGBoost | train | 0.993 | 0.000 | 0.988 | 0.014 |
| test | 0.991 | 0.000 |
| LightGBM | train | 0.830 | 0.001 | 0.989 | 0.014 |
| test | 0.822 | 0.001 |

Notice: CR R2 represents means R2 for 10-fold cross validation, CR R2 std is stander deviation for 10-fold cross validation.

| **ESs** | **model** | **split** | **R2** | **RMSE** | **CR R2** | **CR R2 std** |
| --- | --- | --- | --- | --- | --- | --- |
| CS | Lasso | train | 0.936 | 0.009 | 0.933 | 0.001 |
| test | 0.945 | 0.003 |
| Random Forest | train | 0.991 | 0.000 | 0.993 | 0.009 |
| test | 0.991 | 0.000 |
| XGBoost | train | 0.998 | 0.000 | 0.993 | 0.006 |
| test | 0.997 | 0.000 |
| LightGBM | train | 0.998 | 0.000 | 0.995 | 0.003 |
| test | 0.997 | 0.000 |
| GP | Lasso | train | 0.994 | 0.001 | 0.995 | 0.000 |
| test | 0.994 | 0.001 |
| Random Forest | train | 0.997 | 0.000 | 0.998 | 0.002 |
| test | 0.998 | 0.000 |
| XGBoost | train | 0.999 | 0.000 | 0.999 | 0.001 |
| test | 0.999 | 0.000 |
| LightGBM | train | 0.999 | 0.000 | 0.997 | 0.002 |
| test | 0.998 | 0.000 |
| HQ | Lasso | train | 0.875 | 0.008 | 0.870 | 0.003 |
| test | 0.892 | 0.002 |
| Random Forest | train | 0.993 | 0.000 | 0.992 | 0.005 |
| test | 0.990 | 0.001 |
| XGBoost | train | 0.998 | 0.000 | 0.996 | 0.003 |
| test | 0.990 | 0.000 |
| LightGBM | train | 0.996 | 0.000 | 0.998 | 0.009 |
| test | 0.993 | 0.000 |
| SC | Lasso | train | 0.903 | 0.009 | 0.902 | 0.009 |
| test | 0.904 | 0.000 |
| Random Forest | train | 0.996 | 0.001 | 0.991 | 0.006 |
| test | 0.991 | 0.001 |
| XGBoost | train | 0.999 | 0.001 | 0.993 | 0.004 |
| test | 0.992 | 0.000 |
| LightGBM | train | 0.999 | 0.001 | 0.997 | 0.005 |
| test | 0.997 | 0.000 |
| WY | Lasso | train | 0.830 | 0.001 | 0.831 | 0.016 |
| test | 0.822 | 0.001 |
| Random Forest | train | 0.989 | 0.000 | 0.988 | 0.018 |
| test | 0.988 | 0.000 |
| XGBoost | train | 0.996 | 0.000 | 0.989 | 0.014 |
| test | 0.997 | 0.000 |
| LightGBM | train | 0.993 | 0.000 | 0.987 | 0.014 |
| test | 0.991 | 0.000 |

**Table S6**: Comparison of model parameters at sub basin scales in 2020

Notice: CR R2 represents means R2 for 10-fold cross validation, CR R2 std is stander deviation for 10-fold cross validation.

**List of figures**


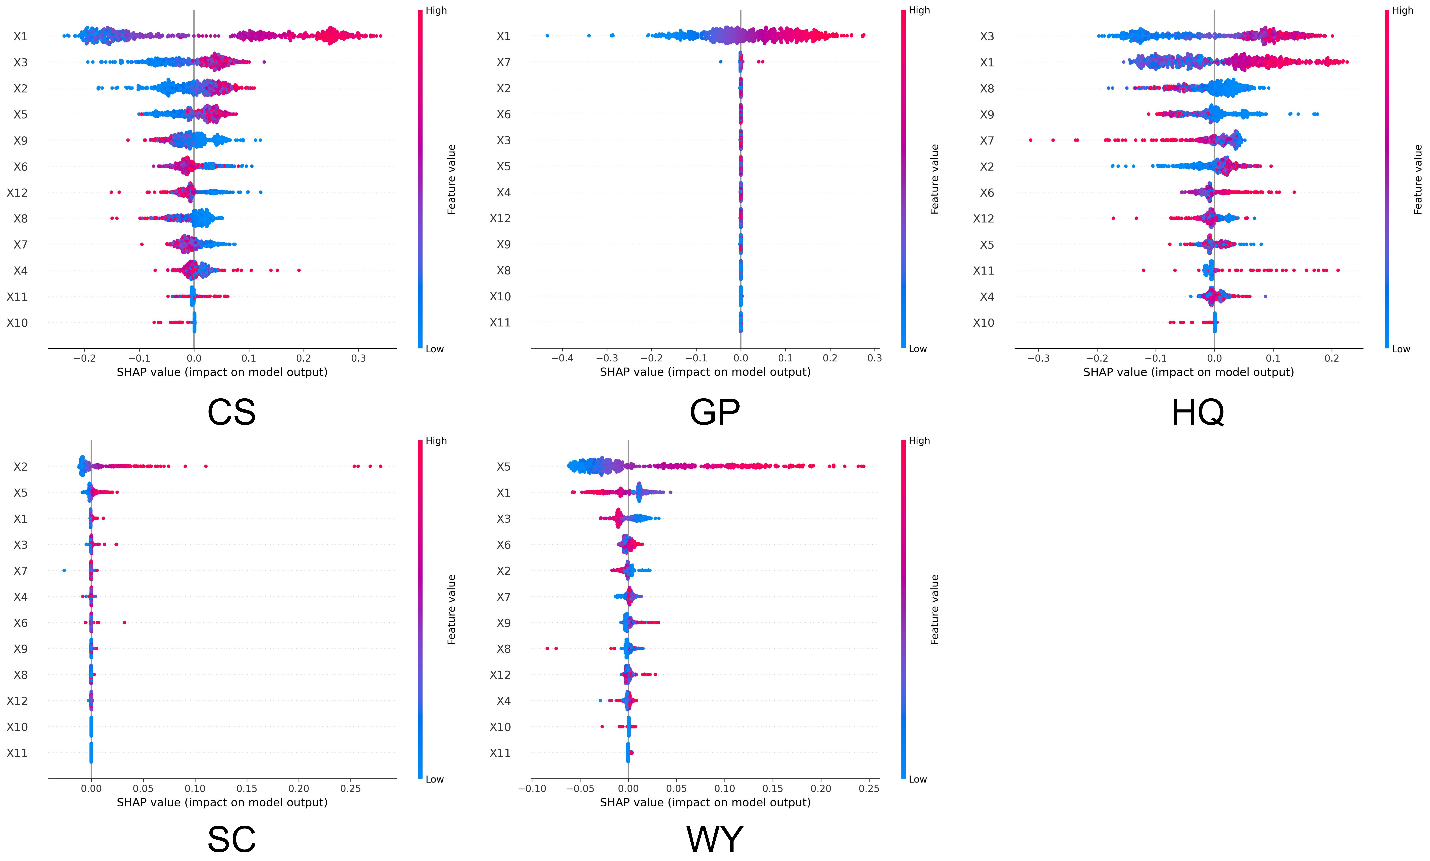
 **Figure S1.** Feature importance of ESs at pixel scale in 2000.

**
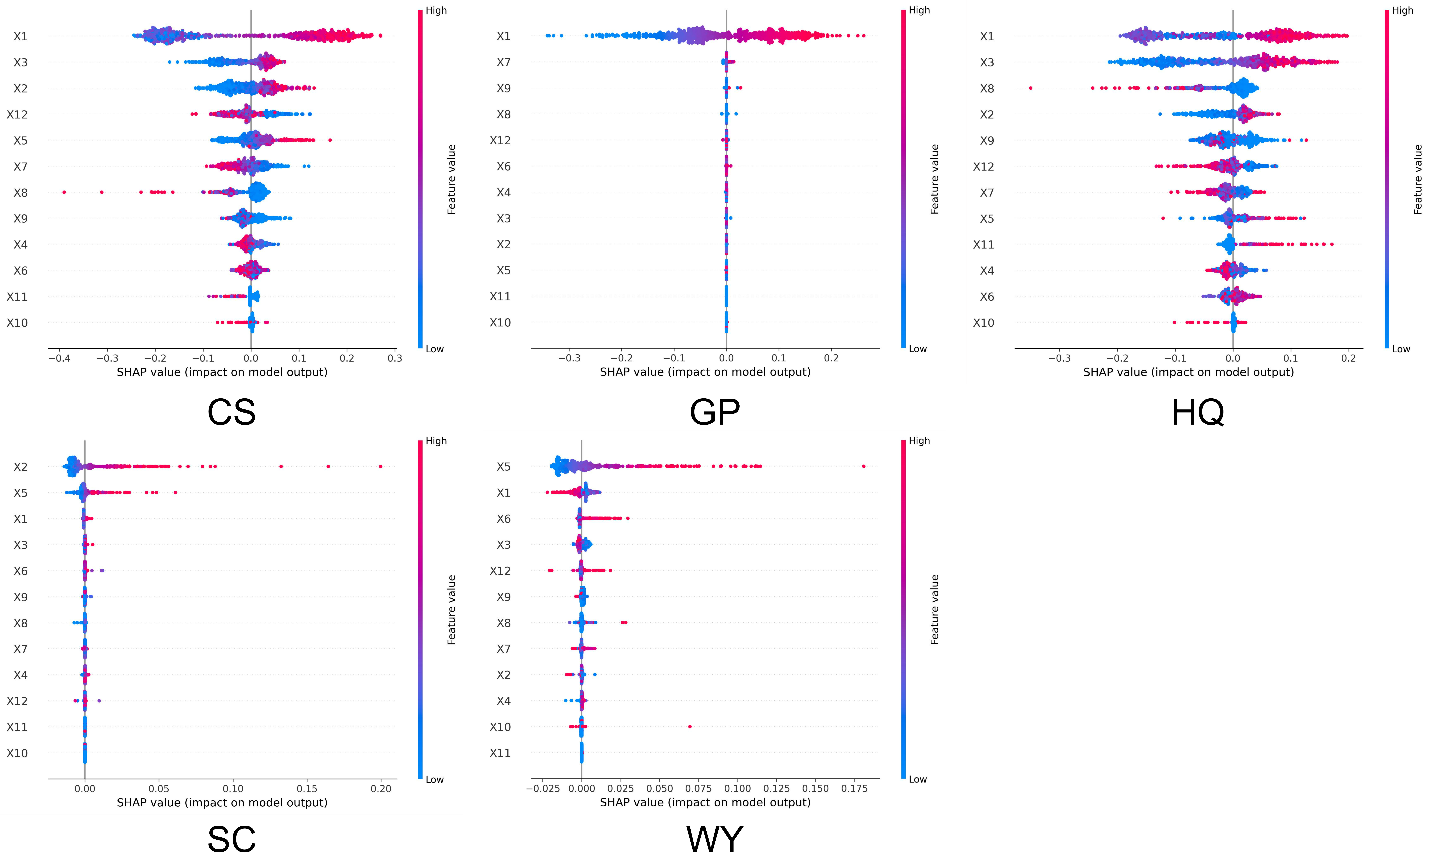
**

**Figure S2.** Feature importance of ESs at pixel scale in 2010.


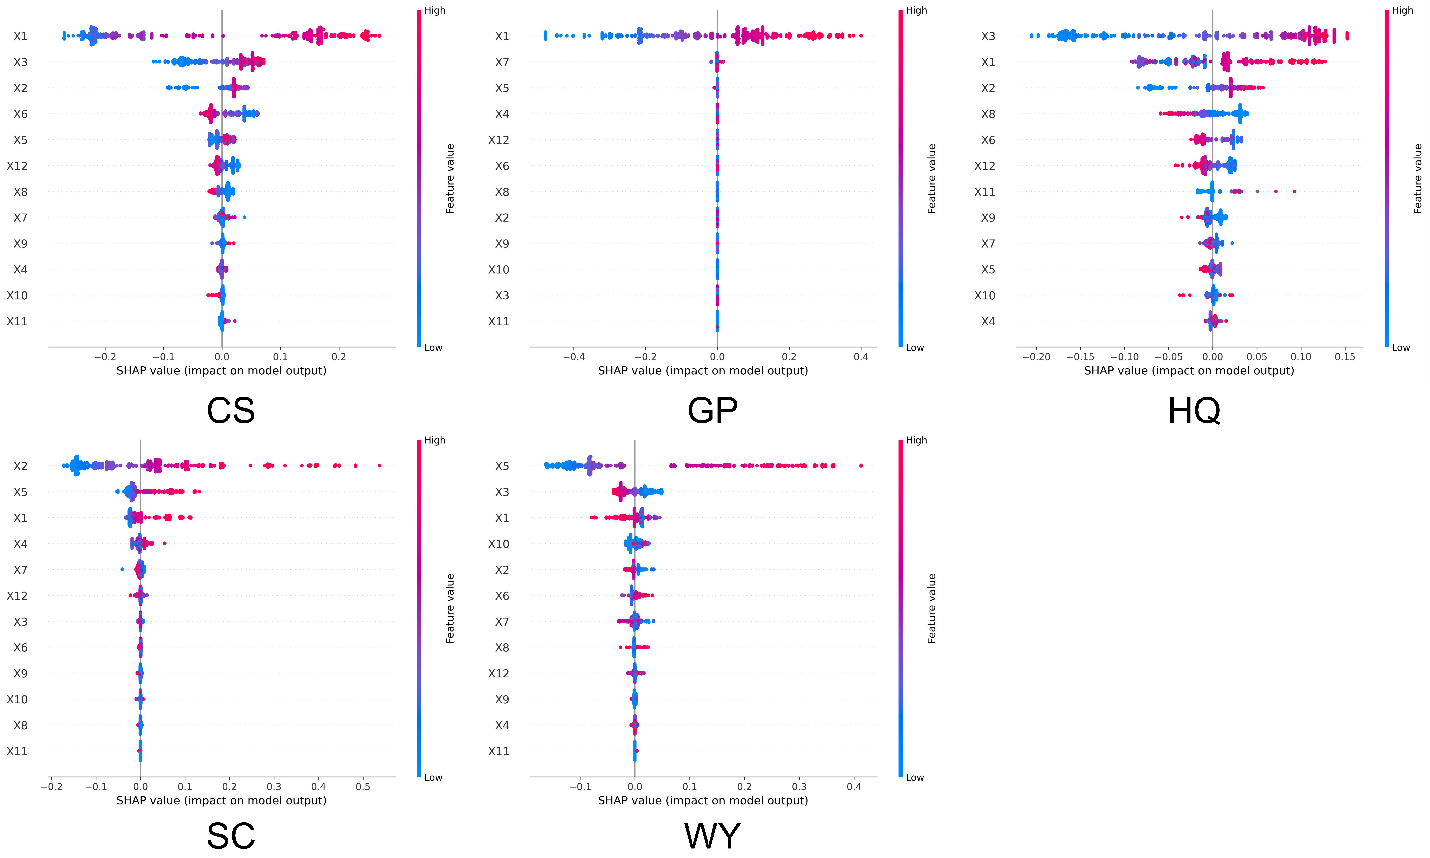


**Figure S3.** Feature importance of ESs at county scale in 2000.


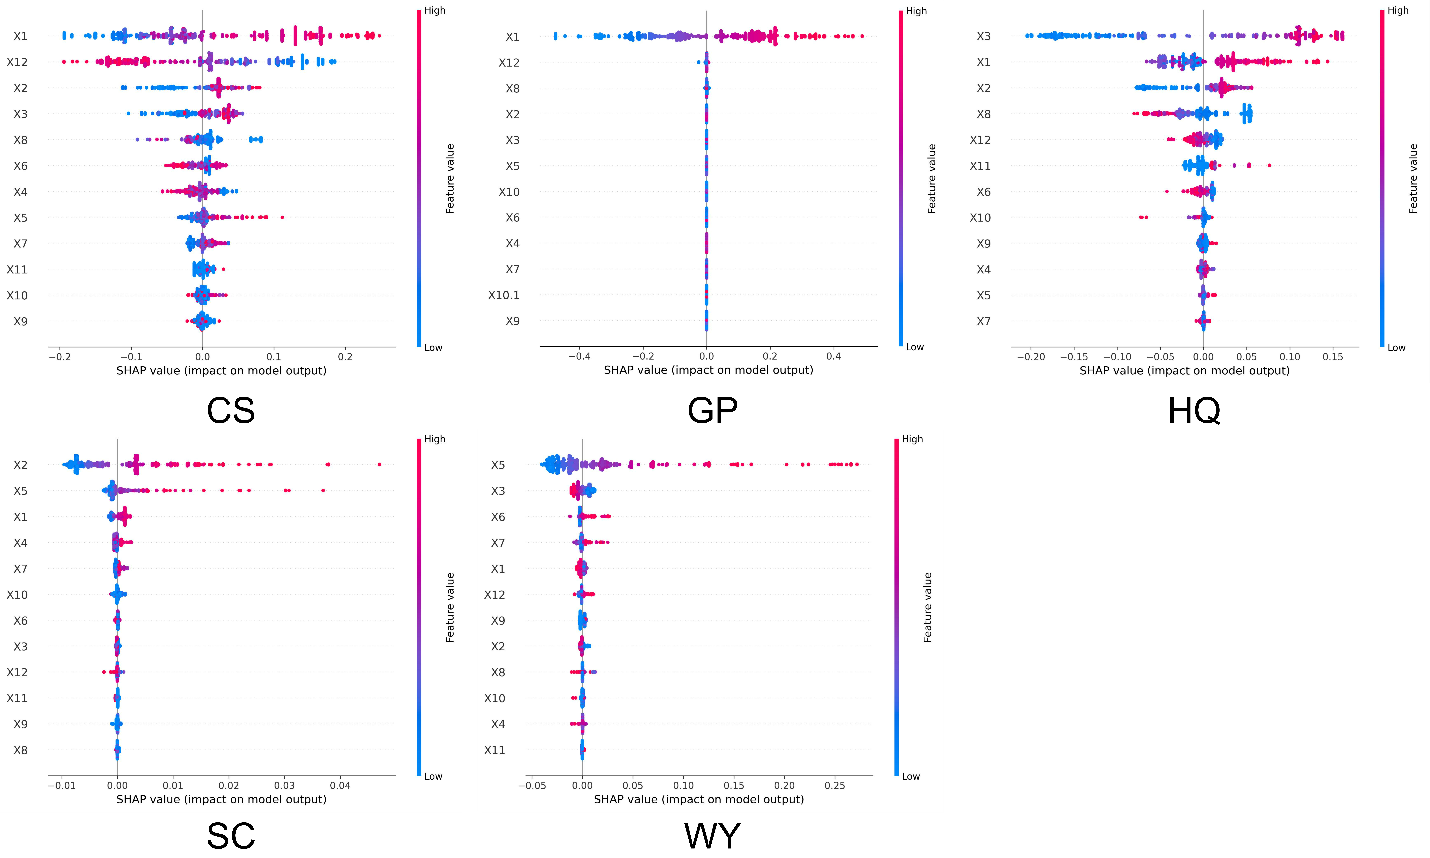


**Figure S4**. Feature importance of ESs at county scale in 2010.


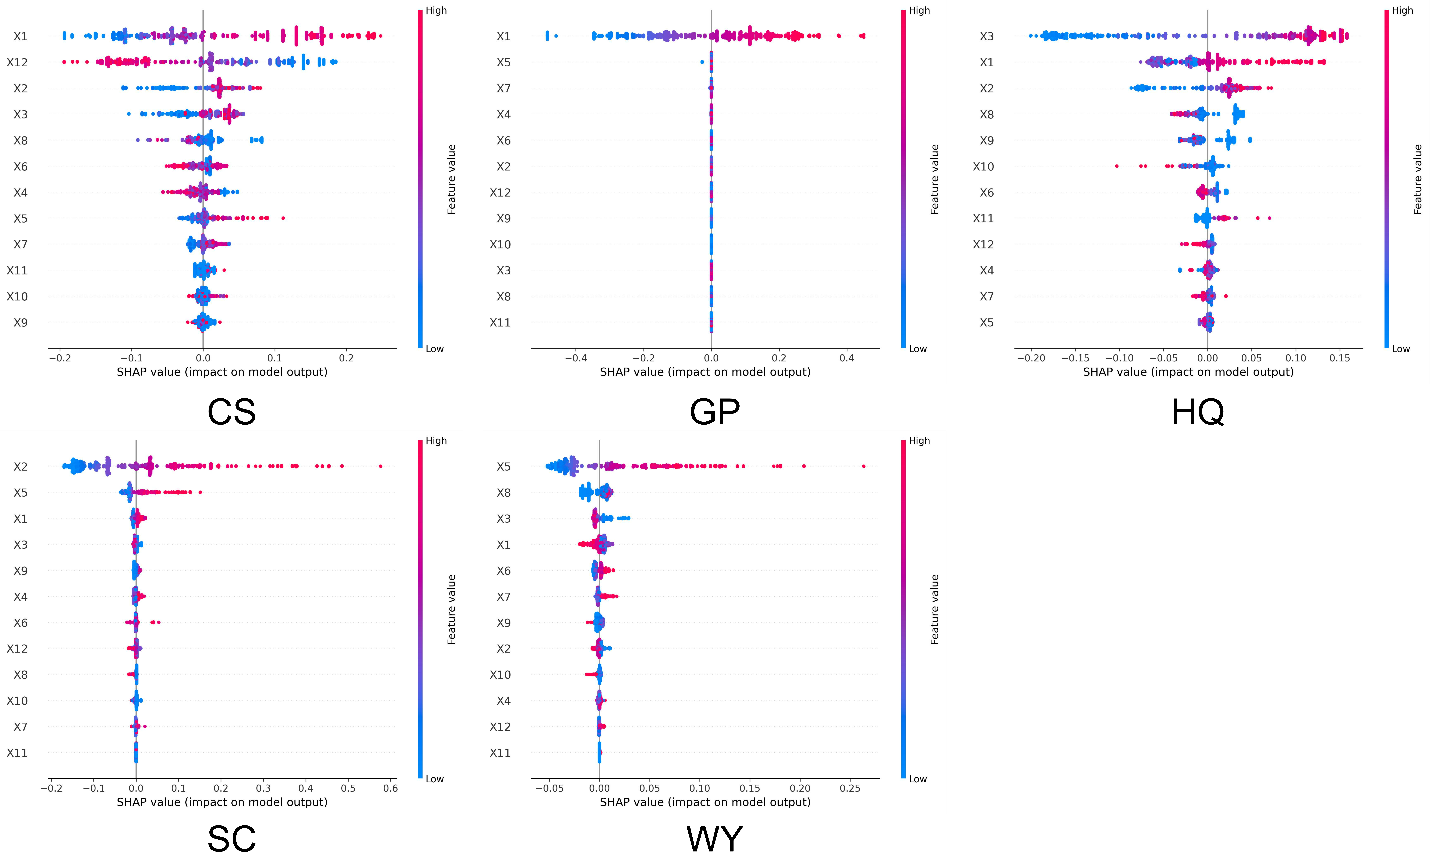


**Figure S5.** Feature importance of ESs at county scale in 2020.


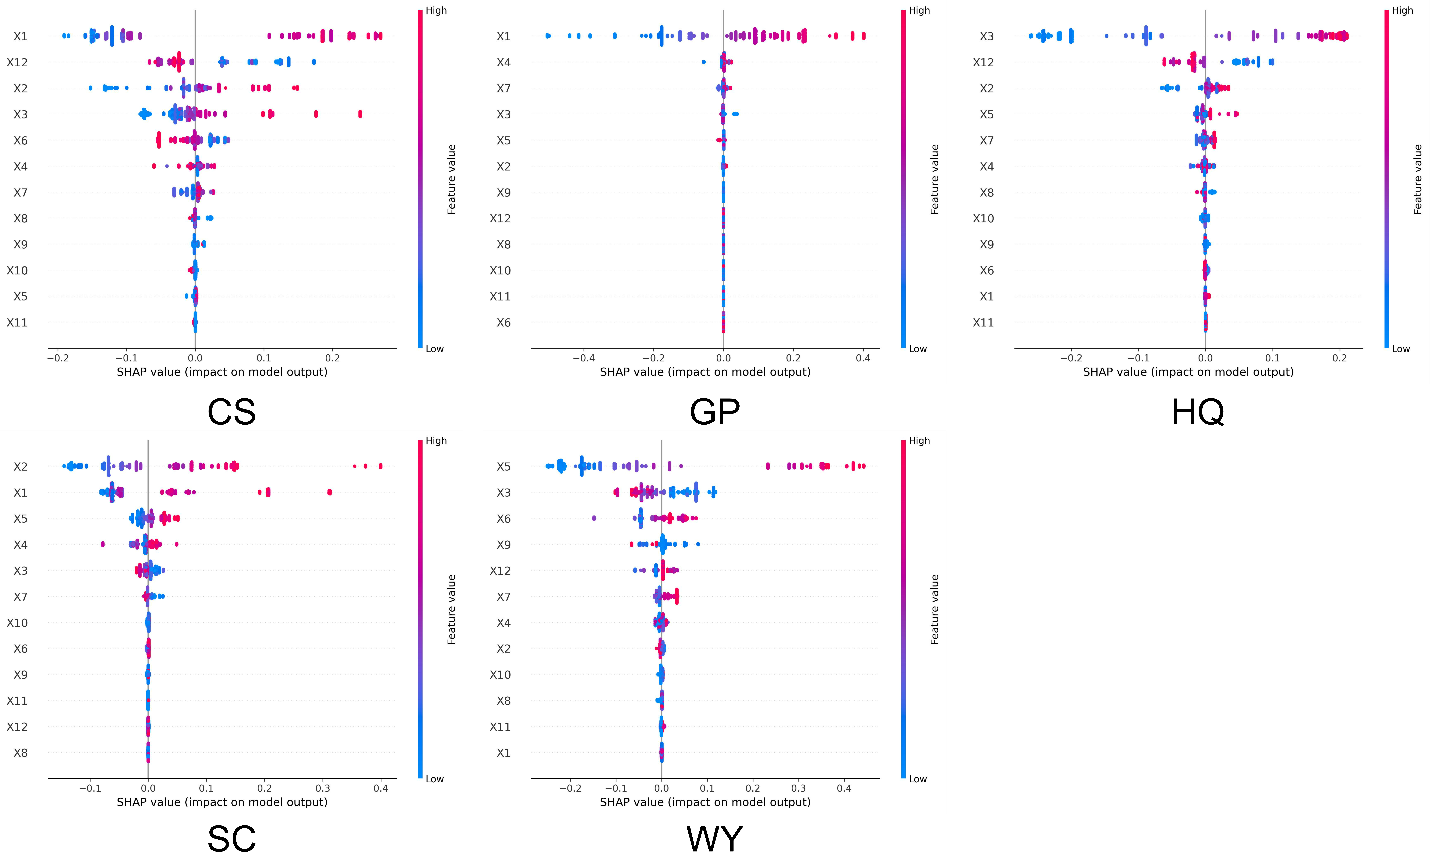


**Figure S6.** Feature importance of ESs at sub basin scale in 2000


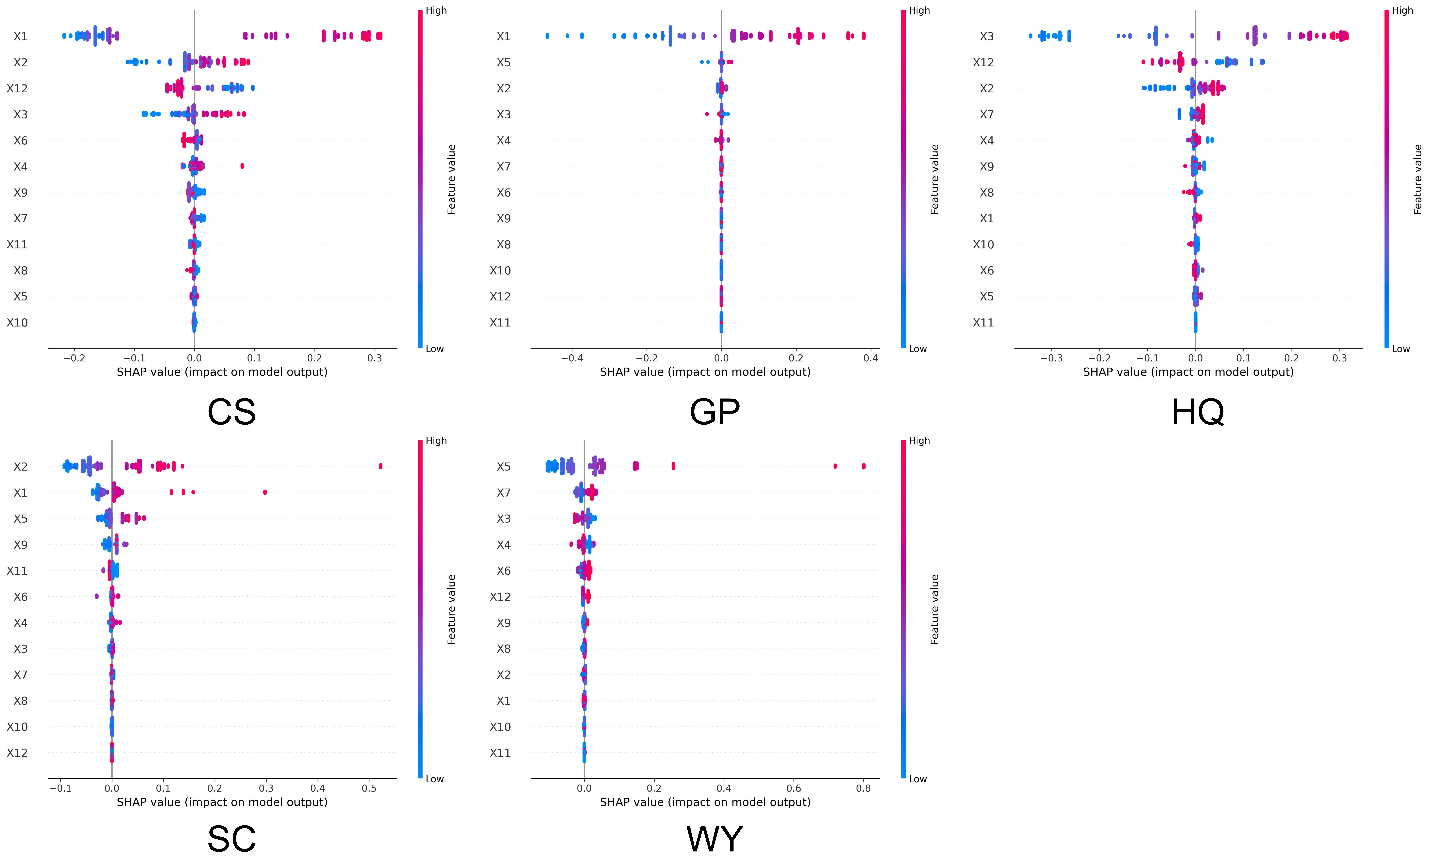


**Figure S7.** Feature importance of ESs at sub basin scale in 2010.


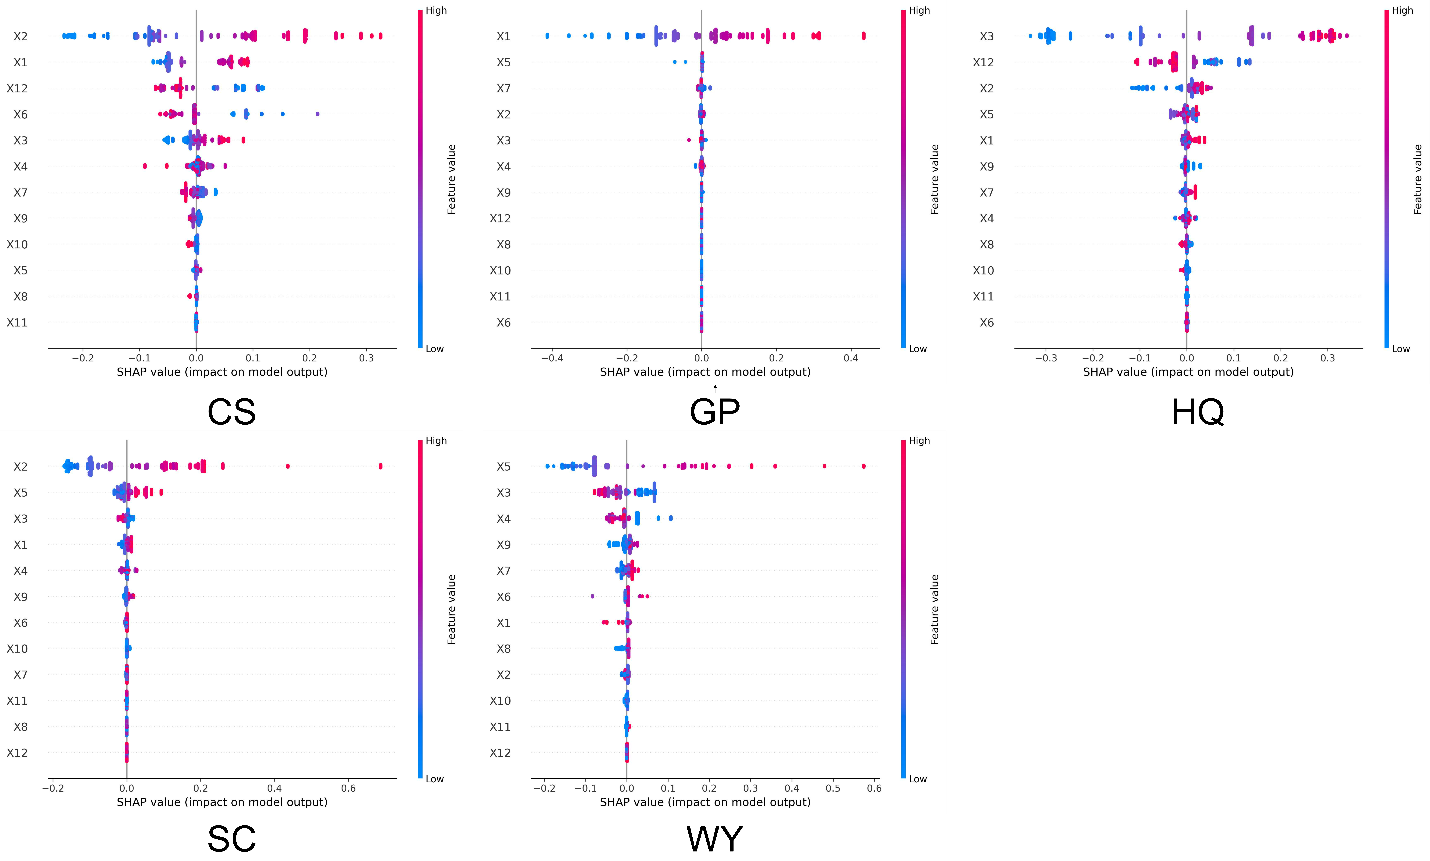


**Figure S8.** Feature importance of ESs at sub basin scale in 2020.


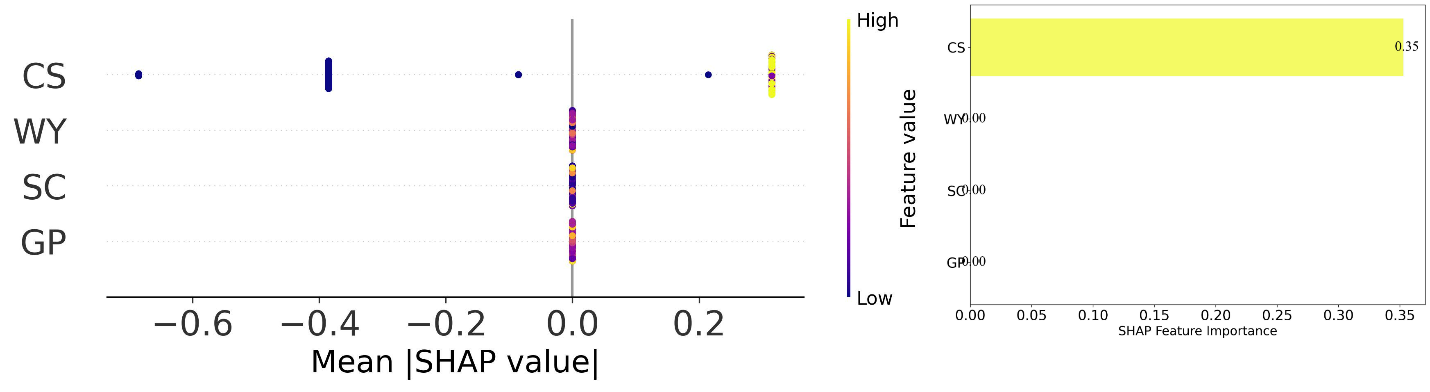


**Figure S9:** SHAP summary plot for pixel scale in 2020


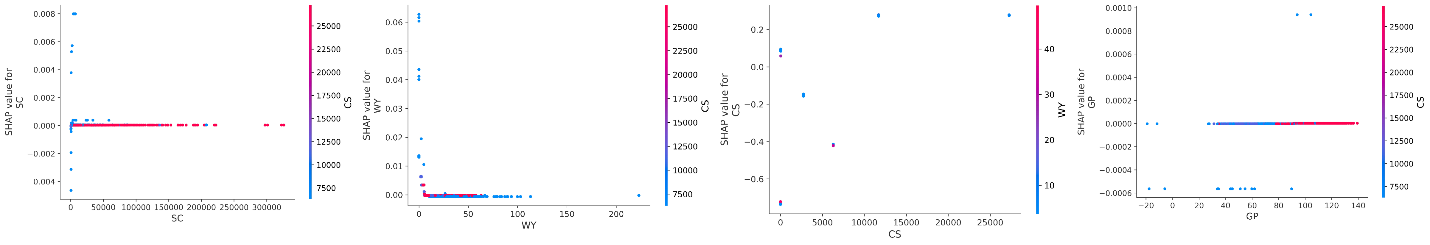


**Figure S10:** Dependence plots for features in pixel scale in 2020.
